# Supplementary material
Source: PubMed Central journal article supplement (PMC9841440)
Supplement: NIHMS1856109-supplement-3.pdf [file NIHMS1856109-supplement-3.pdf]

## ■ ASSOCIATED CONTENT

### SI Supporting Information

The Supporting Information is available free of charge at <https://pubs.acs.org/doi/10.1021/acsbiomaterials.0c00788>.

Table S1, list of human growth factors detected by antibody array C1 (RayBiotech) ([PDF](#))

Movie S1, spontaneous beating of hiPSC-derived CMs ([AVI](#))
