# Supplementary material
Source: PubMed Central journal article supplement (PMC9841440)
Supplement: NIHMS1856109-supplement-Supplementary_table.pdf [file NIHMS1856109-supplement-Supplementary_table.pdf]

## Supplementary Information

### Pre-seeding of Mesenchymal Stem Cells Increases Integration of iPSC-derived CM Sheet into Cardiac Matrix

Pawan KC,<sup>1</sup> Mickey Shah,<sup>1,2</sup> Rubia Shaik,<sup>1</sup> Yi Hong,<sup>3</sup> Ge Zhang<sup>1,\*</sup>

<sup>1</sup> Department of Biomedical Engineering, The University of Akron, Akron, OH 44325

<sup>2</sup> Department of Integrated Bioscience, The University of Akron, Akron, OH 44325

<sup>3</sup> Department of Bioengineering, University of Texas at Arlington, Arlington, TX 76019

*\*Correspondence should be addressed to ge10@uakron.edu*

This document contains the following additional information:

**Table S1.** List of human growth factors detected by antibody array C1 (RayBiotech)

**Table S1.** List of human growth factors detected by antibody array C1 (RayBiotech)

| <b>Abbreviation</b> | <b>Full protein name</b>                         |
|---------------------|--------------------------------------------------|
| VEGF-A              | Vascular endothelial growth factor-A             |
| VEGFR2              | Vascular endothelial growth factor receptor 2    |
| VEGFR3              | Vascular endothelial growth factor receptor 3    |
| VEGF-D              | Vascular endothelial growth factor-D             |
| TGF $\alpha$        | Transforming growth factor- $\alpha$             |
| TGF $\beta$ 1       | Transforming growth factor- $\beta$ 1            |
| TGF $\beta$ 2       | Transforming growth factor- $\beta$ 2            |
| TGF $\beta$ 3       | Transforming growth factor- $\beta$ 3            |
| bFGF                | Basic fibroblast growth factor                   |
| FGF-4               | Fibroblast growth factor 4                       |
| FGF-6               | Fibroblast growth factor 6                       |
| FGF-7 (KGF)         | Fibroblast growth factor 7                       |
| PDGF R $\alpha$     | Platelet-derived growth factor receptor $\alpha$ |
| PDGF-AA             | Platelet-derived growth factor-AA                |
| PDGF-BB             | Platelet-derived growth factor-BB                |
| PIGF                | Placental growth factor                          |
| GCSF                | Granulocyte colony-stimulating factor            |
| GDNF                | Glial cell line-derived neurotrophic factor      |
| GM-CSF              | Granulocyte-macrophage colony-stimulating factor |
| HB-EGF              | Heparin-binding EGF-like growth factor           |
| IGFBP-1             | Insulin-like growth factor-binding protein 1     |
| IGFBP-3             | Insulin-like growth factor-binding protein 3     |
| IGFBP-4             | Insulin-like growth factor-binding protein 4     |
| IGFBP-6             | Insulin-like growth factor-binding protein 6     |
| IGF-1               | Insulin-like growth factor I                     |
| IGF-1 R             | Insulin-like growth factor 1 receptor            |
| IGF-2               | Insulin-like growth factor II                    |
| M-CSF               | Macrophage colony-stimulating factor 1           |
| M-CSF R             | Macrophage colony-stimulating factor 1 receptor  |
| NT-3                | Neurotrophin-3                                   |
| NT-4                | Neurotrophin-4                                   |
| AR                  | Amphiregulin                                     |
| $\beta$ -NGF        | Beta nerve growth factor                         |
| SCF                 | Stem cell factor (KIT Ligand)                    |
| SCF R (CD117)       | Stem cell factor receptor                        |
| EGFR                | Epidermal growth factor receptor                 |
| EGF                 | Epidermal growth factor                          |
| HGF                 | Hepatocyte growth factor                         |
| IGFBP-2             | Insulin-like growth factor-binding protein 2     |
| PDGF R $\beta$      | Platelet-derived growth factor receptor $\beta$  |
| PDGF-AB             | Platelet-derived growth factor-AB                |
